# Supplementary material for: Influenza Vaccination Effectiveness in Paediatric ‘Healthy’ Patients: A Population-Based Study in Italy
Source: MDPI journal article supplement (doi:10.3390/vaccines10040582), 2022-04-10
Supplement: s1 [file s1]

**Table S1. Socio-demographic and clinical characteristics of the cohorts. Pedianet 2009-2019.**

|  |  | 2009-2010 season |  |             |  | 2010-2011 season |  |             |  |
|--|--|------------------|--|-------------|--|------------------|--|-------------|--|
|  |  | Unvaccinated     |  | Vaccinated  |  | Unvaccinated     |  | Vaccinated  |  |
|  |  | N=23,965         |  |             |  | N=24,355         |  |             |  |
|  |  | 20465 (85.4)     |  | 3500 (14.6) |  | 21955 (90.15)    |  | 2400 (9.85) |  |
|  |  |                  |  |             |  |                  |  |             |  |
|  |  |                  |  |             |  |                  |  |             |  |
|  |  |                  |  |             |  |                  |  |             |  |
|  |  |                  |  |             |  |                  |  |             |  |
|  |  |                  |  |             |  |                  |  |             |  |
|  |  |                  |  |             |  |                  |  |             |  |
|  |  |                  |  |             |  |                  |  |             |  |
|  |  |                  |  |             |  |                  |  |             |  |
|  |  |                  |  |             |  |                  |  |             |  |
|  |  |                  |  |             |  |                  |  |             |  |
|  |  |                  |  |             |  |                  |  |             |  |
|  |  |                  |  |             |  |                  |  |             |  |
|  |  |                  |  |             |  |                  |  |             |  |
|  |  |                  |  |             |  |                  |  |             |  |
|  |  |                  |  |             |  |                  |  |             |  |
|  |  |                  |  |             |  |                  |  |             |  |
|  |  |                  |  |             |  |                  |  |             |  |
|  |  |                  |  |             |  |                  |  |             |  |
|  |  |                  |  |             |  |                  |  |             |  |
|  |  |                  |  |             |  |                  |  |             |  |
|  |  |                  |  |             |  |                  |  |             |  |
|  |  |                  |  |             |  |                  |  |             |  |
|  |  |                  |  |             |  |                  |  |             |  |
|  |  |                  |  |             |  |                  |  |             |  |
|  |  |                  |  |             |  |                  |  |             |  |
|  |  |                  |  |             |  |                  |  |             |  |
|  |  |                  |  |             |  |                  |  |             |  |
|  |  |                  |  |             |  |                  |  |             |  |
|  |  |                  |  |             |  |                  |  |             |  |
|  |  |                  |  |             |  |                  |  |             |  |
|  |  |                  |  |             |  |                  |  |             |  |
|  |  |                  |  |             |  |                  |  |             |  |
|  |  |                  |  |             |  |                  |  |             |  |
|  |  |                  |  |             |  |                  |  |             |  |
|  |  |                  |  |             |  |                  |  |             |  |
|  |  |                  |  |             |  |                  |  |             |  |
|  |  |                  |  |             |  |                  |  |             |  |
|  |  |                  |  |             |  |                  |  |             |  |
|  |  |                  |  |             |  |                  |  |             |  |
|  |  |                  |  |             |  |                  |  |             |  |
|  |  |                  |  |             |  |                  |  |             |  |
|  |  |                  |  |             |  |                  |  |             |  |
|  |  |                  |  |             |  |                  |  |             |  |
|  |  |                  |  |             |  |                  |  |             |  |
|  |  |                  |  |             |  |                  |  |             |  |
|  |  |                  |  |             |  |                  |  |             |  |
|  |  |                  |  |             |  |                  |  |             |  |
|  |  |                  |  |             |  |                  |  |             |  |
|  |  |                  |  |             |  |                  |  |             |  |
|  |  |                  |  |             |  |                  |  |             |  |
|  |  |                  |  |             |  |                  |  |             |  |
|  |  |                  |  |             |  |                  |  |             |  |
|  |  |                  |  |             |  |                  |  |             |  |
|  |  |                  |  |             |  |                  |  |             |  |
|  |  |                  |  |             |  |                  |  |             |  |
|  |  |                  |  |             |  |                  |  |             |  |
|  |  |                  |  |             |  |                  |  |             |  |
|  |  |                  |  |             |  |                  |  |             |  |
|  |  |                  |  |             |  |                  |  |             |  |
|  |  |                  |  |             |  |                  |  |             |  |
|  |  |                  |  |             |  |                  |  |             |  |
|  |  |                  |  |             |  |                  |  |             |  |
|  |  |                  |  |             |  |                  |  |             |  |
|  |  |                  |  |             |  |                  |  |             |  |
|  |  |                  |  |             |  |                  |  |             |  |
|  |  |                  |  |             |  |                  |  |             |  |
|  |  |                  |  |             |  |                  |  |             |  |
|  |  |                  |  |             |  |                  |  |             |  |
|  |  |                  |  |             |  |                  |  |             |  |
|  |  |                  |  |             |  |                  |  |             |  |
|  |  |                  |  |             |  |                  |  |             |  |
|  |  |                  |  |             |  |                  |  |             |  |
|  |  |                  |  |             |  |                  |  |             |  |
|  |  |                  |  |             |  |                  |  |             |  |
|  |  |                  |  |             |  |                  |  |             |  |
|  |  |                  |  |             |  |                  |  |             |  |
|  |  |                  |  |             |  |                  |  |             |  |
|  |  |                  |  |             |  |                  |  |             |  |
|  |  |                  |  |             |  |                  |  |             |  |
|  |  |                  |  |             |  |                  |  |             |  |
|  |  |                  |  |             |  |                  |  |             |  |
|  |  |                  |  |             |  |                  |  |             |  |
|  |  |                  |  |             |  |                  |  |             |  |
|  |  |                  |  |             |  |                  |  |             |  |
|  |  |                  |  |             |  |                  |  |             |  |
|  |  |                  |  |             |  |                  |  |             |  |
|  |  |                  |  |             |  |                  |  |             |  |
|  |  |                  |  |             |  |                  |  |             |  |
|  |  |                  |  |             |  |                  |  |             |  |
|  |  |                  |  |             |  |                  |  |             |  |
|  |  |                  |  |             |  |                  |  |             |  |
|  |  |                  |  |             |  |                  |  |             |  |
|  |  |                  |  |             |  |                  |  |             |  |
|  |  |                  |  |             |  |                  |  |             |  |
|  |  |                  |  |             |  |                  |  |             |  |
|  |  |                  |  |             |  |                  |  |             |  |
|  |  |                  |  |             |  |                  |  |             |  |
|  |  |                  |  |             |  |                  |  |             |  |
|  |  |                  |  |             |  |                  |  |             |  |
|  |  |                  |  |             |  |                  |  |             |  |
|  |  |                  |  |             |  |                  |  |             |  |
|  |  |                  |  |             |  |                  |  |             |  |
|  |  |                  |  |             |  |                  |  |             |  |
|  |  |                  |  |             |  |                  |  |             |  |
|  |  |                  |  |             |  |                  |  |             |  |
|  |  |                  |  |             |  |                  |  |             |  |
|  |  |                  |  |             |  |                  |  |             |  |
|  |  |                  |  |             |  |                  |  |             |  |
|  |  |                  |  |             |  |                  |  |             |  |
|  |  |                  |  |             |  |                  |  |             |  |
|  |  |                  |  |             |  |                  |  |             |  |
|  |  |                  |  |             |  |                  |  |             |  |
|  |  |                  |  |             |  |                  |  |             |  |
|  |  |                  |  |             |  |                  |  |             |  |
|  |  |                  |  |             |  |                  |  |             |  |
|  |  |                  |  |             |  |                  |  |             |  |
|  |  |                  |  |             |  |                  |  |             |  |
|  |  |                  |  |             |  |                  |  |             |  |
|  |  |                  |  |             |  |                  |  |             |  |
|  |  |                  |  |             |  |                  |  |             |  |
|  |  |                  |  |             |  |                  |  |             |  |
|  |  |                  |  |             |  |                  |  |             |  |
|  |  |                  |  |             |  |                  |  |             |  |
|  |  |                  |  |             |  |                  |  |             |  |
|  |  |                  |  |             |  |                  |  |             |  |
|  |  |                  |  |             |  |                  |  |             |  |
|  |  |                  |  |             |  |                  |  |             |  |
|  |  |                  |  |             |  |                  |  |             |  |
|  |  |                  |  |             |  |                  |  |             |  |
|  |  |                  |  |             |  |                  |  |             |  |
|  |  |                  |  |             |  |                  |  |             |  |
|  |  |                  |  |             |  |                  |  |             |  |
|  |  |                  |  |             |  |                  |  |             |  |
|  |  |                  |  |             |  |                  |  |             |  |
|  |  |                  |  |             |  |                  |  |             |  |
|  |  |                  |  |             |  |                  |  |             |  |
|  |  |                  |  |             |  |                  |  |             |  |
|  |  |                  |  |             |  |                  |  |             |  |
|  |  |                  |  |             |  |                  |  |             |  |
|  |  |                  |  |             |  |                  |  |             |  |
|  |  |                  |  |             |  |                  |  |             |  |
|  |  |                  |  |             |  |                  |  |             |  |
|  |  |                  |  |             |  |                  |  |             |  |

|                                                   |  | 2011-2012 season |         |             |         | 2012-2013 season |       |             |       |         |
|---------------------------------------------------|--|------------------|---------|-------------|---------|------------------|-------|-------------|-------|---------|
|                                                   |  | Unvaccinated     |         | Vaccinated  |         | Unvaccinated     |       | Vaccinated  |       |         |
|                                                   |  | N=26,160         |         |             |         | N=21,928         |       |             |       |         |
|                                                   |  | 23940 (91.51)    |         | 2220 (8.49) |         | 20300 (92.58)    |       | 1628 (7.42) |       |         |
| Age in mo. - mean (std)                           |  | 82.01            | (39.21) | 77.94       | (35.86) | <0.0001          | 83.29 | (39.48)     | 79.94 | (36.39) |
| Follow-up in weks - mean (std)                    |  | 29.37            | (3.38)  | 29.78       | (2.63)  | <0.0001          | 28.75 | (3.81)      | 29.59 | (2.6)   |
| Gender                                            |  |                  |         |             |         | <0.0001          |       |             |       |         |
| female                                            |  | 11682            | (48.8)  | 985         | (44.37) |                  | 9826  | (48.4)      | 745   | (45.76) |
| male                                              |  | 12258            | (51.2)  | 1235        | (55.63) |                  | 10474 | (51.6)      | 883   | (54.24) |
| Influenza vaccine in the previous year            |  |                  |         |             |         | <0.0001          |       |             |       |         |
| No                                                |  | 23190            | (96.87) | 566         | (25.5)  |                  | 19443 | (95.78)     | 501   | (30.77) |
| Yes                                               |  | 750              | (3.13)  | 1654        | (74.5)  |                  | 857   | (4.22)      | 1127  | (69.23) |
| Influenza diagnosis in the previous year          |  |                  |         |             |         | <0.0001          |       |             |       |         |
| No                                                |  | 20934            | (87.44) | 2054        | (92.52) |                  | 18695 | (92.09)     | 1556  | (95.58) |
| Yes                                               |  | 3006             | (12.56) | 166         | (7.48)  |                  | 1605  | (7.91)      | 72    | (4.42)  |
| No. of Antibiotic Therapy                         |  |                  |         |             |         | <0.0001          |       |             |       |         |
| 0                                                 |  | 14630            | (61.11) | 1047        | (47.16) |                  | 12097 | (59.59)     | 774   | (47.54) |
| 1                                                 |  | 5191             | (21.68) | 504         | (22.7)  |                  | 4585  | (22.59)     | 380   | (23.34) |
| ≥2                                                |  | 4119             | (17.21) | 669         | (30.14) |                  | 3618  | (17.82)     | 474   | (29.12) |
| No. of Antibiotic Therapy in the previous year    |  |                  |         |             |         | <0.0001          |       |             |       |         |
| 0                                                 |  | 13017            | (54.37) | 886         | (39.91) |                  | 12081 | (59.51)     | 739   | (45.39) |
| 1                                                 |  | 5539             | (23.14) | 484         | (21.8)  |                  | 4378  | (21.57)     | 366   | (22.48) |
| ≥2                                                |  | 5384             | (22.49) | 850         | (38.29) |                  | 3841  | (18.92)     | 523   | (32.13) |
| No. of Outpatient Visits                          |  |                  |         |             |         | <0.0001          |       |             |       |         |
| 0                                                 |  | 4977             | (20.79) | 22          | (0.99)  |                  | 3956  | (19.49)     | 24    | (1.47)  |
| 1                                                 |  | 5048             | (21.09) | 222         | (10)    |                  | 4167  | (20.53)     | 161   | (9.89)  |
| 2                                                 |  | 4119             | (17.21) | 302         | (13.6)  |                  | 3514  | (17.31)     | 252   | (15.48) |
| ≥3                                                |  | 9796             | (40.92) | 1674        | (75.41) |                  | 8663  | (42.67)     | 1191  | (73.16) |
| No. of Outpatient Visits in the previous year     |  |                  |         |             |         | <0.0001          |       |             |       |         |
| 0                                                 |  | 3850             | (16.08) | 56          | (2.52)  |                  | 3762  | (18.53)     | 77    | (4.73)  |
| 1                                                 |  | 4386             | (18.32) | 187         | (8.42)  |                  | 3891  | (19.17)     | 151   | (9.28)  |
| 2                                                 |  | 3919             | (16.37) | 262         | (11.8)  |                  | 3352  | (16.51)     | 199   | (12.22) |
| ≥3                                                |  | 11785            | (49.23) | 1715        | (77.25) |                  | 9295  | (45.79)     | 1201  | (73.77) |
| Place of Birth                                    |  |                  |         |             |         | <0.0001          |       |             |       |         |
| North                                             |  | 10969            | (46.3)  | 769         | (34.84) |                  | 10096 | (49.91)     | 731   | (44.98) |
| Island                                            |  | 1249             | (5.27)  | 460         | (20.84) |                  | 930   | (4.6)       | 299   | (18.4)  |
| Center                                            |  | 5045             | (21.3)  | 256         | (11.6)  |                  | 3799  | (18.78)     | 141   | (8.68)  |
| South                                             |  | 6427             | (27.13) | 722         | (32.71) |                  | 5404  | (26.71)     | 454   | (27.94) |
| Influenza and/or influenza-like illness diagnosis |  |                  |         |             |         | <0.0001          |       |             |       |         |
| No                                                |  | 22165            | (92.59) | 2126        | (95.77) |                  | 17780 | (87.59)     | 1548  | (95.09) |
| Yes                                               |  | 1775             | (7.41)  | 94          | (4.23)  |                  | 2520  | (12.41)     | 80    | (4.91)  |

|                                                   |  | 2013-2014 season |         |             |         | 2014-2015 season |       |             |       |         |         |
|---------------------------------------------------|--|------------------|---------|-------------|---------|------------------|-------|-------------|-------|---------|---------|
|                                                   |  | Unvaccinated     |         | Vaccinated  |         | Unvaccinated     |       | Vaccinated  |       |         |         |
|                                                   |  | N=22,542         |         |             |         | N=20,490         |       |             |       |         |         |
|                                                   |  | 20832 (92.41)    |         | 1710 (7.59) |         | 19139 (93.41)    |       | 1351 (6.59) |       |         |         |
| Age in mo. - mean (std)                           |  | 85.51            | (39.77) | 81.72       | (36.47) | 0.0001           | 87.69 | (39.92)     | 83.86 | (36.98) | 0.0006  |
| Follow-up in weks - mean (std)                    |  | 29.66            | (2.47)  | 29.9        | (1.78)  | <0.0001          | 28.98 | (3.82)      | 29.67 | (2.53)  | <0.0001 |
| Gender                                            |  |                  |         |             |         | 0.0508           |       |             |       |         | 0.6944  |
| female                                            |  | 10038            | (48.19) | 782         | (45.73) |                  | 9144  | (47.78)     | 638   | (47.22) |         |
| male                                              |  | 10794            | (51.81) | 928         | (54.27) |                  | 9995  | (52.22)     | 713   | (52.78) |         |
| Influenza vaccine in the previous year            |  |                  |         |             |         | <0.0001          |       |             |       |         | <0.0001 |
| No                                                |  | 20401            | (97.93) | 545         | (31.87) |                  | 18505 | (96.69)     | 339   | (25.09) |         |
| Yes                                               |  | 431              | (2.07)  | 1165        | (68.13) |                  | 634   | (3.31)      | 1012  | (74.91) |         |
| Influenza diagnosis in the previous year          |  |                  |         |             |         | <0.0001          |       |             |       |         | 0.0003  |
| No                                                |  | 18329            | (87.98) | 1573        | (91.99) |                  | 18311 | (95.67)     | 1320  | (97.71) |         |
| Yes                                               |  | 2503             | (12.02) | 137         | (8.01)  |                  | 828   | (4.33)      | 31    | (2.29)  |         |
| No. of Antibiotic Therapy                         |  |                  |         |             |         | <0.0001          |       |             |       |         | <0.0001 |
| 0                                                 |  | 13303            | (63.86) | 781         | (45.67) |                  | 12243 | (63.97)     | 686   | (50.78) |         |
| 1                                                 |  | 4333             | (20.8)  | 363         | (21.23) |                  | 3969  | (20.74)     | 308   | (22.8)  |         |
| ≥2                                                |  | 3196             | (15.34) | 566         | (33.1)  |                  | 2927  | (15.29)     | 357   | (26.42) |         |
| No. of Antibiotic Therapy in the previous year    |  |                  |         |             |         | <0.0001          |       |             |       |         | <0.0001 |
| 0                                                 |  | 12294            | (59.01) | 721         | (42.16) |                  | 11637 | (60.8)      | 568   | (42.04) |         |
| 1                                                 |  | 4738             | (22.74) | 404         | (23.63) |                  | 4101  | (21.43)     | 285   | (21.1)  |         |
| ≥2                                                |  | 3800             | (18.24) | 585         | (34.21) |                  | 3401  | (17.77)     | 498   | (36.86) |         |
| No. of Outpatient Visits                          |  |                  |         |             |         | <0.0001          |       |             |       |         | <0.0001 |
| 0                                                 |  | 4360             | (20.93) | 14          | (0.82)  |                  | 3944  | (20.61)     | 6     | (0.44)  |         |
| 1                                                 |  | 4486             | (21.53) | 175         | (10.23) |                  | 3969  | (20.74)     | 145   | (10.73) |         |
| 2                                                 |  | 3628             | (17.42) | 253         | (14.8)  |                  | 3224  | (16.85)     | 204   | (15.1)  |         |
| ≥3                                                |  | 8358             | (40.12) | 1268        | (74.15) |                  | 8002  | (41.81)     | 996   | (73.72) |         |
| No. of Outpatient Visits in the previous year     |  |                  |         |             |         | <0.0001          |       |             |       |         | <0.0001 |
| 0                                                 |  | 3821             | (18.34) | 63          | (3.68)  |                  | 3558  | (18.59)     | 42    | (3.11)  |         |
| 1                                                 |  | 4165             | (19.99) | 157         | (9.18)  |                  | 3768  | (19.69)     | 132   | (9.77)  |         |
| 2                                                 |  | 3552             | (17.05) | 238         | (13.92) |                  | 3214  | (16.79)     | 186   | (13.77) |         |
| ≥3                                                |  | 9294             | (44.61) | 1252        | (73.22) |                  | 8599  | (44.93)     | 991   | (73.35) |         |
| Place of Birth                                    |  |                  |         |             |         | <0.0001          |       |             |       |         | <0.0001 |
| North                                             |  | 10893            | (52.55) | 699         | (40.93) |                  | 8619  | (45.21)     | 550   | (40.77) |         |
| Island                                            |  | 1557             | (7.51)  | 392         | (22.95) |                  | 1720  | (9.02)      | 271   | (20.09) |         |
| Center                                            |  | 3738             | (18.03) | 99          | (5.8)   |                  | 4317  | (22.64)     | 102   | (7.56)  |         |
| South                                             |  | 4539             | (21.9)  | 518         | (30.33) |                  | 4408  | (23.12)     | 426   | (31.58) |         |
| Influenza and/or influenza-like illness diagnosis |  |                  |         |             |         | <0.0001          |       |             |       |         | <0.0001 |
| No                                                |  | 19986            | (95.94) | 1676        | (98.01) |                  | 17386 | (90.84)     | 1300  | (96.23) |         |
| Yes                                               |  | 846              | (4.06)  | 34          | (1.99)  |                  | 1753  | (9.16)      | 51    | (3.77)  |         |

|                                                   |        | 2015-2106 season |         |             |         | 2016-2017 season |       |             |       |         |         |
|---------------------------------------------------|--------|------------------|---------|-------------|---------|------------------|-------|-------------|-------|---------|---------|
|                                                   |        | Unvaccinated     |         | Vaccinated  |         | Unvaccinated     |       | Vaccinated  |       |         |         |
|                                                   |        | N=17,106         |         |             |         | N=19,110         |       |             |       |         |         |
|                                                   |        | 15796 (92.34)    |         | 1310 (7.66) |         | 17627 (92.24)    |       | 1483 (7.76) |       |         |         |
| Age in mo. - mean (std)                           |        | 89.16            | (40.1)  | 83.6        | (37.75) | <0.0001          | 92.22 | (39.87)     | 85.35 | (38.01) | <0.0001 |
| Follow-up in weks - mean (std)                    |        | 29.24            | (3.35)  | 29.87       | (2.15)  | <0.0001          | 29.21 | (3.75)      | 29.82 | (2.26)  | <0.0001 |
| Gender                                            |        |                  |         |             |         | 0.1728           |       |             |       |         | 0.1774  |
|                                                   | female | 7544             | (47.76) | 600         | (45.8)  |                  | 8344  | (47.34)     | 675   | (45.52) |         |
|                                                   | male   | 8252             | (52.24) | 710         | (54.2)  |                  | 9283  | (52.66)     | 808   | (54.48) |         |
| Influenza vaccine in the previous year            |        |                  |         |             |         | <0.0001          |       |             |       |         | <0.0001 |
|                                                   | No     | 15496            | (98.1)  | 388         | (29.62) |                  | 17367 | (98.52)     | 516   | (34.79) |         |
|                                                   | Yes    | 300              | (1.9)   | 922         | (70.38) |                  | 260   | (1.48)      | 967   | (65.21) |         |
| Influenza diagnosis in the previous year          |        |                  |         |             |         | 0.0005           |       |             |       |         | <0.0001 |
|                                                   | No     | 14585            | (92.33) | 1244        | (94.96) |                  | 15943 | (90.45)     | 1391  | (93.8)  |         |
|                                                   | Yes    | 1211             | (7.67)  | 66          | (5.04)  |                  | 1684  | (9.55)      | 92    | (6.2)   |         |
| No. of Antibiotic Therapy                         |        |                  |         |             |         | <0.0001          |       |             |       |         | <0.0001 |
|                                                   | 0      | 10191            | (64.52) | 622         | (47.48) |                  | 11975 | (67.94)     | 719   | (48.48) |         |
|                                                   | 1      | 3286             | (20.8)  | 308         | (23.51) |                  | 3477  | (19.73)     | 348   | (23.47) |         |
|                                                   | ≥2     | 2319             | (14.68) | 380         | (29.01) |                  | 2175  | (12.34)     | 416   | (28.05) |         |
| No. of Antibiotic Therapy in the previous year    |        |                  |         |             |         | <0.0001          |       |             |       |         | <0.0001 |
|                                                   | 0      | 9664             | (61.18) | 600         | (45.8)  |                  | 11250 | (63.82)     | 667   | (44.98) |         |
|                                                   | 1      | 3423             | (21.67) | 291         | (22.21) |                  | 3743  | (21.23)     | 327   | (22.05) |         |
|                                                   | ≥2     | 2709             | (17.15) | 419         | (31.98) |                  | 2634  | (14.94)     | 489   | (32.97) |         |
| No. of Outpatient Visits                          |        |                  |         |             |         | <0.0001          |       |             |       |         | <0.0001 |
|                                                   | 0      | 3263             | (20.66) | 9           | (0.69)  |                  | 3895  | (22.1)      | 3     | (0.2)   |         |
|                                                   | 1      | 3351             | (21.21) | 129         | (9.85)  |                  | 4151  | (23.55)     | 142   | (9.58)  |         |
|                                                   | 2      | 2711             | (17.16) | 178         | (13.59) |                  | 3034  | (17.21)     | 215   | (14.5)  |         |
|                                                   | ≥3     | 6471             | (40.97) | 994         | (75.88) |                  | 6547  | (37.14)     | 1123  | (75.72) |         |
| No. of Outpatient Visits in the previous year     |        |                  |         |             |         | <0.0001          |       |             |       |         | <0.0001 |
|                                                   | 0      | 3002             | (19)    | 40          | (3.05)  |                  | 3316  | (18.81)     | 43    | (2.9)   |         |
|                                                   | 1      | 3146             | (19.92) | 135         | (10.31) |                  | 3605  | (20.45)     | 140   | (9.44)  |         |
|                                                   | 2      | 2541             | (16.09) | 183         | (13.97) |                  | 3053  | (17.32)     | 205   | (13.82) |         |
|                                                   | ≥3     | 7107             | (44.99) | 952         | (72.67) |                  | 7653  | (43.42)     | 1095  | (73.84) |         |
| Place of Birth                                    |        |                  |         |             |         | <0.0001          |       |             |       |         | <0.0001 |
|                                                   | North  | 7168             | (45.53) | 490         | (37.49) |                  | 8578  | (48.81)     | 535   | (36.1)  |         |
|                                                   | Island | 1052             | (6.68)  | 306         | (23.41) |                  | 1598  | (9.09)      | 378   | (25.51) |         |
|                                                   | Center | 2719             | (17.27) | 60          | (4.59)  |                  | 3900  | (22.19)     | 115   | (7.76)  |         |
|                                                   | South  | 4804             | (30.52) | 451         | (34.51) |                  | 3497  | (19.9)      | 454   | (30.63) |         |
| Influenza and/or influenza-like illness diagnosis |        |                  |         |             |         | <0.0001          |       |             |       |         | <0.0001 |
|                                                   | No     | 14207            | (89.94) | 1257        | (95.95) |                  | 16510 | (93.66)     | 1451  | (97.84) |         |
|                                                   | Yes    | 1589             | (10.06) | 53          | (4.05)  |                  | 1117  | (6.34)      | 32    | (2.16)  |         |

|                                                   |        | 2017-2018 season |         |             |         | 2018-2019 season |       |             |       |         |         |
|---------------------------------------------------|--------|------------------|---------|-------------|---------|------------------|-------|-------------|-------|---------|---------|
|                                                   |        | Unvaccinated     |         | Vaccinated  |         | Unvaccinated     |       | Vaccinated  |       |         |         |
|                                                   |        | N=15,203         |         |             |         | N=18,589         |       |             |       |         |         |
|                                                   |        | 13841 (91.04)    |         | 1362 (8.96) |         | 16973 (91.31)    |       | 1616 (8.69) |       |         |         |
| Age in mo. - mean (std)                           |        | 94.4             | (40.43) | 86.48       | (39.25) | <0.0001          | 94.54 | (39.96)     | 84.67 | (38.97) | <0.0001 |
| Follow-up in weks - mean (std)                    |        | 28.59            | (4.41)  | 29.8        | (2.11)  | <0.0001          | 29.22 | (3.39)      | 29.72 | (2.33)  | <0.0001 |
| Gender                                            |        |                  |         |             |         | 0.7508           |       |             |       |         | 0.3602  |
|                                                   | female | 6556             | (47.37) | 639         | (46.92) |                  | 8085  | (47.63)     | 789   | (48.82) |         |
|                                                   | male   | 7285             | (52.63) | 723         | (53.08) |                  | 8888  | (52.37)     | 827   | (51.18) |         |
| Influenza vaccine in the previous year            |        |                  |         |             |         | <0.0001          |       |             |       |         | <0.0001 |
|                                                   | No     | 13533            | (97.77) | 318         | (23.35) |                  | 16695 | (98.36)     | 540   | (33.42) |         |
|                                                   | Yes    | 308              | (2.23)  | 1044        | (76.65) |                  | 278   | (1.64)      | 1076  | (66.58) |         |
| Influenza diagnosis in the previous year          |        |                  |         |             |         | <0.0001          |       |             |       |         | <0.0001 |
|                                                   | No     | 12879            | (93.05) | 1306        | (95.89) |                  | 15088 | (88.89)     | 1505  | (93.13) |         |
|                                                   | Yes    | 962              | (6.95)  | 56          | (4.11)  |                  | 1885  | (11.11)     | 111   | (6.87)  |         |
| No. of Antibiotic Therapy                         |        |                  |         |             |         | <0.0001          |       |             |       |         | <0.0001 |
|                                                   | 0      | 9422             | (68.07) | 708         | (51.98) |                  | 12014 | (70.78)     | 808   | (50)    |         |
|                                                   | 1      | 2718             | (19.64) | 318         | (23.35) |                  | 3088  | (18.19)     | 355   | (21.97) |         |
|                                                   | ≥2     | 1701             | (12.29) | 336         | (24.67) |                  | 1871  | (11.02)     | 453   | (28.03) |         |
| No. of Antibiotic Therapy in the previous year    |        |                  |         |             |         | <0.0001          |       |             |       |         | <0.0001 |
|                                                   | 0      | 9007             | (65.07) | 616         | (45.23) |                  | 11278 | (66.45)     | 759   | (46.97) |         |
|                                                   | 1      | 2867             | (20.71) | 305         | (22.39) |                  | 3511  | (20.69)     | 378   | (23.39) |         |
|                                                   | ≥2     | 1967             | (14.21) | 441         | (32.38) |                  | 2184  | (12.87)     | 479   | (29.64) |         |
| No. of Outpatient Visits                          |        |                  |         |             |         | <0.0001          |       |             |       |         | <0.0001 |
|                                                   | 0      | 2993             | (21.62) | 0           | (0)     |                  | 4028  | (23.73)     | 0     | (0)     |         |
|                                                   | 1      | 3371             | (24.36) | 153         | (11.23) |                  | 4226  | (24.9)      | 188   | (11.63) |         |
|                                                   | 2      | 2431             | (17.56) | 236         | (17.33) |                  | 2956  | (17.42)     | 224   | (13.86) |         |
|                                                   | ≥3     | 5046             | (36.46) | 973         | (71.44) |                  | 5763  | (33.95)     | 1204  | (74.5)  |         |
| No. of Outpatient Visits in the previous year     |        |                  |         |             |         | <0.0001          |       |             |       |         | <0.0001 |
|                                                   | 0      | 2665             | (19.25) | 28          | (2.06)  |                  | 3361  | (19.8)      | 54    | (3.34)  |         |
|                                                   | 1      | 2984             | (21.56) | 123         | (9.03)  |                  | 3864  | (22.77)     | 165   | (10.21) |         |
|                                                   | 2      | 2314             | (16.72) | 177         | (13)    |                  | 2989  | (17.61)     | 233   | (14.42) |         |
|                                                   | ≥3     | 5878             | (42.47) | 1034        | (75.92) |                  | 6759  | (39.82)     | 1164  | (72.03) |         |
| Place of Birth                                    |        |                  |         |             |         | <0.0001          |       |             |       |         | <0.0001 |
|                                                   | North  | 6484             | (47.02) | 461         | (33.87) |                  | 8687  | (51.6)      | 566   | (35.18) |         |
|                                                   | Island | 1074             | (7.79)  | 362         | (26.6)  |                  | 1438  | (8.54)      | 451   | (28.03) |         |
|                                                   | Center | 3064             | (22.22) | 94          | (6.91)  |                  | 2848  | (16.92)     | 106   | (6.59)  |         |
|                                                   | South  | 3169             | (22.98) | 444         | (32.62) |                  | 3863  | (22.94)     | 486   | (30.21) |         |
| Influenza and/or influenza-like illness diagnosis |        |                  |         |             |         | <0.0001          |       |             |       |         | <0.0001 |
|                                                   | No     | 12243            | (88.45) | 1326        | (97.36) |                  | 15714 | (92.58)     | 1562  | (96.66) |         |
|                                                   | Yes    | 1598             | (11.55) | 36          | (2.64)  |                  | 1259  | (7.42)      | 54    | (3.34)  |         |
